# Supplementary material for: Occurrence and Risk Factors of Relapse Activity after Vaccination against COVID-19 in People with Multiple Sclerosis: 1-Year Follow-Up Results from a Nationwide Longitudinal Observational Study
Source: Vaccines (Basel). 2023 Dec 16;11(12):1859. doi: 10.3390/vaccines11121859 (PMC10747540; doi:10.3390/vaccines11121859)
Supplement: Supplementary file 1 [file vaccines-11-01859-s001.zip]

Archive with 5 entries (5 files):
- REV_Supplementary Figure S1.pdf
- REV_Supplementary Figure S2.pdf
- REV_Supplementary Figure S3.pdf
- REV_Supplementary File S1.pdf
- REV_Supplementary Table S1.xlsx
