# Supplementary material for: Occurrence and Risk Factors of Relapse Activity after Vaccination against COVID-19 in People with Multiple Sclerosis: 1-Year Follow-Up Results from a Nationwide Longitudinal Observational Study
Source: Vaccines (Basel). 2023 Dec 16;11(12):1859. doi: 10.3390/vaccines11121859 (PMC10747540; doi:10.3390/vaccines11121859)
Supplement: Supplementary file 1 [file vaccines-11-01859-s001.zip › REV_Supplementary Table S1.xlsx]

## Sheet: Table S1
Supplementary Table S1. Sociodemographic and clinical characterization of people with MS stratified by age, gender and post-vaccination relapse occurrence
PV relapse ovccurrence	Yes												No
Age group [years]	18-30		31-40		41-50		51-60		>60		n.a.		18-30			31-40			41-50		51-60			>60			n.a.
Gender	Male	Female	Male	Female	Male	Female	Male	Female	Male	Female	Male	Female	Divers	Male	Female	Divers	Male	Female	Male	Female	Divers	Male	Female	Divers	Male	Female	Male	Female
N	2	42	12	108	12	76	11	52	9	14	1	2	1	24	157	3	91	401	125	478	1	162	467	1	70	138	2	4
MS disease course, N (%)
RRMS	2 (100.0)	39 (92.9)	10 (83.3)	104 (96.3)	12 (100.0)	66 (86.8)	6 (54.5)	36 (69.2)	2 (22.2)	5 (35.7)	1 (100.0)	2 (100.0)	1 (100.0)	21 (87.5)	148 (94.3)	2 (66.7)	78 (85.7)	364 (90.8)	93 (74.4)	383 (80.1)	1 (100.0)	74 (45.7)	296 (63.4)	1 (100.0)	22 (31.4)	52 (37.7)	2 (100.0)	4 (100.0)
SPMS	0 (0.0)	0 (0.0)	2 (16.7)	1 (0.9)	0 (0.0)	7 (9.2)	2 (18.2)	13 (25.0)	3 (33.3)	5 (35.7)	0 (0.0)	0 (0.0)	0 (0.0)	0 (0.0)	4 (2.5)	1 (33.3)	5 (5.5)	20 (5.0)	23 (18.4)	59 (12.3)	0 (0.0)	62 (38.3)	127 (27.2)	0 (0.0)	36 (51.4)	64 (46.4)	0 (0.0)	0 (0.0)
PPMS	0 (0.0)	0 (0.0)	0 (0.0)	1 (0.9)	0 (0.0)	1 (1.3)	2 (18.2)	3 (5.8)	2 (22.2)	3 (21.4)	0 (0.0)	0 (0.0)	0 (0.0)	1 (4.2)	0 (0.0)	0 (0.0)	3 (3.3)	3 (0.7)	6 (4.8)	9 (1.9)	0 (0.0)	21 (13.0)	22 (4.7)	0 (0.0)	10 (14.3)	15 (10.9)	0 (0.0)	0 (0.0)
Undefined	0 (0.0)	3 (7.1)	0 (0.0)	2 (1.9)	0 (0.0)	2 (2.6)	1 (9.1)	0 (0.0)	2 (22.2)	1 (7.1)	0 (0.0)	0 (0.0)	0 (0.0)	2 (8.3)	5 (3.2)	0 (0.0)	5 (5.5)	14 (3.5)	3 (2.4)	27 (5.6)	0 (0.0)	5 (3.1)	22 (4.7)	0 (0.0)	2 (2.9)	7 (5.1)	0 (0.0)	0 (0.0)
Disability level (PDDS), N (%)*
Mild (0–1)	1 (50.0)	28 (68.3)	6 (50.0)	61 (61.6)	6 (50.0)	29 (42.0)	2 (18.2)	14 (27.5)	0 (0.0)	4 (30.8)	1 (100.0)	1 (100.0)	1 (100.0)	19 (79.2)	128 (85.3)	1 (33.3)	61 (69.3)	290 (74.9)	67 (54.9)	244 (53.0)	0 (0.0)	51 (32.3)	183 (40.0)	0 (0.0)	13 (18.8)	33 (24.3)	2 (100.0)	2 (50.0)
Moderate (2–4)	1 (50.0)	12 (29.3)	4 (33.3)	35 (35.4)	5 (41.7)	34 (49.3)	8 (72.7)	30 (58.8)	2 (22.2)	2 (15.4)	0 (0.0)	0 (0.0)	0 (0.0)	4 (16.7)	22 (14.7)	1 (33.3)	23 (26.1)	84 (21.7)	34 (27.9)	174 (37.8)	1 (100.0)	64 (40.5)	210 (46.0)	0 (0.0)	26 (37.7)	51 (37.5)	0 (0.0)	2 (50.0)
Severe (≥5)	0 (0.0)	1 (2.4)	2 (16.7)	3 (3.0)	1 (8.3)	6 (8.7)	1 (9.1)	7 (13.7)	7 (77.8)	7 (53.8)	0 (0.0)	0 (0.0)	0 (0.0)	1 (4.2)	0 (0.0)	1 (33.3)	4 (4.5)	13 (3.4)	21 (17.2)	42 (9.1)	0 (0.0)	43 (27.2)	64 (14.0)	1 (100.0)	30 (43.5)	52 (38.2)	0 (0.0)	0 (0.0)
Coincident autoimmune diseases at BL, N (%)	0 (0.0)	9 (21.4)	1 (8.3)	33 (30.6)	3 (25.0)	16 (21.1)	2 (18.2)	24 (46.2)	2 (22.2)	4 (28.6)	1 (100.0)	0 (0.0)	0 (0.0)	3 (12.5)	26 (16.6)	1 (33.3)	9 (9.9)	80 (20.0)	6 (4.8)	115 (24.1)	0 (0.0)	24 (14.8)	137 (29.3)	0 (0.0)	11 (15.7)	23 (16.7)	0 (0.0)	0 (0.0)
DMT at BL, N (%)
IFNβ/GLAT	1 (50.0)	8 (19.0)	0 (0.0)	25 (23.1)	4 (33.3)	8 (10.5)	1 (9.1)	10 (19.2)	1 (11.1)	1 (7.1)	0 (0.0)	0 (0.0)	0 (0.0)	3 (12.5)	29 (18.5)	1 (33.3)	13 (14.3)	101 (25.2)	27 (21.6)	115 (24.1)	0 (0.0)	31 (19.1)	118 (25.3)	0 (0.0)	12 (17.1)	25 (18.1)	1 (50.0)	0 (0.0)
CLAD/DMF/TER	0 (0.0)	7 (16.7)	4 (33.3)	25 (23.1)	3 (25.0)	24 (31.6)	2 (18.2)	9 (17.3)	0 (0.0)	1 (7.1)	1 (100.0)	1 (50.0)	0 (0.0)	5 (20.8)	45 (28.7)	1 (33.3)	23 (25.3)	103 (25.7)	36 (28.8)	100 (20.9)	0 (0.0)	27 (16.7)	75 (16.1)	0 (0.0)	3 (4.3)	12 (8.7)	0 (0.0)	0 (0.0)
S1P RM	0 (0.0)	3 (7.1)	0 (0.0)	8 (7.4)	1 (8.3)	9 (11.8)	0 (0.0)	5 (9.62)	2 (22.2)	0 (0.0)	0 (0.0)	0 (0.0)	1 (100.0)	6 (25.0)	23 (14.6)	0 (0.0)	18 (19.8)	51 (12.7)	20 (16.0)	66 (13.8)	0 (0.0)	22 (13.6)	57 (12.2)	0 (0.0)	4 (5.7)	8 (5.8)	1 (50.0)	1 (25.0)
anti-CD20 MAB	0 (0.0)	7 (16.7)	2 (16.7)	12 (11.1)	1 (8.3)	10 (13.2)	5 (45.5)	4 (7.7)	0 (0.0)	1 (7.1)	0 (0.0)	0 (0.0)	0 (0.0)	6 (25.0)	32 (20.4)	0 (0.0)	21 (23.1)	48 (12.0)	16 (12.8)	47 (9.8)	0 (0.0)	20 (12.3)	41 (8.8)	0 (0.0)	5 (7.1)	4 (2.9)	0 (0.0)	1 (25.0)
Natalizumab	0 (0.0)	1 (2.4)	2 (16.7)	3 (2.8)	0 (0.0)	3 (3.9)	0 (0.0)	1 (1.9)	0 (0.0)	0 (0.0)	0 (0.0)	0 (0.0)	0 (0.0)	1 (4.2)	9 (5.7)	0 (0.0)	6 (6.6)	27 (6.7)	5 (4.0)	24 (5.0)	0 (0.0)	3 (1.9)	13 (2.8)	0 (0.0)	0 (0.0)	4 (2.9)	0 (0.0)	0 (0.0)
Other	0 (0.0)	1 (2.4)	0 (0.0)	0 (0.0)	0 (0.0)	3 (3.9)	0 (0.0)	3 (5.8)	1 (11.1)	1 (7.1)	0 (0.0)	0 (0.0)	0 (0.0)	0 (0.0)	2 (1.3)	0 (0.0)	2 (2.2)	7 (1.7)	2 (1.6)	9 (1.9)	0 (0.0)	5 (3.1)	16 (3.4)	0 (0.0)	5 (7.1)	7 (5.1)	0 (0.0)	1 (25.0)
Unknown DMT	0 (0.0)	0 (0.0)	0 (0.0)	0 (0.0)	0 (0.0)	0 (0.0)	0 (0.0)	0 (0.0)	0 (0.0)	0 (0.0)	0 (0.0)	0 (0.0)	0 (0.0)	0 (0.0)	1 (0.6)	0 (0.0)	0 (0.0)	0 (0.0)	0 (0.0)	1 (0.2)	0 (0.0)	1 (0.6)	4 (0.9)	0 (0.0)	1 (1.4)	0 (0.0)	0 (0.0)	0 (0.0)
Relapse within the year prior to 1st VACC, N (%)*	1 (50.0)	13 (38.2)	2 (18.2)	34 (42.0)	3 (30.0)	22 (34.9)	2 (25.0)	11 (28.2)	1 (16.7)	2 (25.0)	n.a.	n.a.	n.a.	7 (33.3)	45 (31.7)	0 (0.0)	9 (12.3)	75 (22.4)	11 (12.8)	68 (18.3)	1 (100.0)	10 (10.9)	36 (11.4)	0 (0.0)	5 (14.3)	4 (5.4)	n.a.	0 (0.0)
Relapse within 6 months prior to 1st VACC, N (%)*	1 (50.0)	8 (23.5)	2 (18.2)	23 (28.4)	2 (20.0%)	14 (22.2)	2 (25.0)	4 (10.3)	0 (0.0)	1 (12.5)	n.a.	n.a.	n.a.	2 (9.5)	31 (21.8)	0 (0.0)	4 (5.5)	34 (10.1)	4 (4.7)	38 (10.2)	1 (100.0)	3 (3.3)	20 (6.3)	0 (0.0)	3 (8.6)	0 (0.0)	n.a.	0 (0.0)
Relapse within 3 months prior to 1st VACC, N (%)*	1 (50.0)	4 (11.8)	2 (18.2)	11 (13.6)	0 (0.0)	9 (14.3)	0 (0.0)	2 (5.1)	0 (0.0)	0 (0.0)	n.a.	n.a.	n.a.	0 (0.0)	9 (6.34)	0 (0.0)	2 (2.7)	11 (3.3)	3 (3.5)	18 (4.9)	1 (100.0)	2 (2.2)	10 (3.2)	0 (0.0)	2 (5.7)	0 (0.0)	n.a.	0 (0.0)
Time from last relapse (before 1st VACC) to 1st VACC [years], median (Q25, Q75)	2.7 (1.5, 4.0)	1.65 (0.5, 3.0)	1.6 (1.2, 3.6)	1.6 (0.4, 4.1)	5.4 (1.1, 7.65)	2.0 (0.6, 4.6)	2.9 (1.0, 7.45)	2.4 (0.8, 5.2)	1.5 (1.25, 5.3)	2.7 (1.0, 5.0)	n.a.	n.a.	n.a.	2.5 (0.9, 4.2)	1.8 (0.55, 3.05)	1.3 (1.3, 1.8)	2.9 (1.8, 6.1)	2.7 (1.2, 5.2)	4.3 (2.1, 7.0)	3.55 (1.5, 7.1)	0.2 (0.2, 0.2)	4.9 (2.0, 9.2)	5.0 (2.0, 9.8)	1.9 (1.9, 1.9)	7.4 (2.6, 10.5)	8.4 (4.1, 17.0)	n.a.	9.6 (9.6, 9.6)
Anti-CD20 MAB – anti-CD20 monoclonal antibody (ocrelizumab/ofatumumab/rituximab)
BL – baseline survey
Chi – chi-square test of independence
CLAD – cladribine
DMF – dimethyl fumarate
DMT – disease-modifying therapy
Fi – Fisher’s exact test
GLAT – glatiramer acetate
IFNβ – interferon beta (interferon beta-1a/interferon beta-1b/peginterferon beta-1a)
MS – multiple sclerosis
N – number of patients
n.a. – not applicable
PDDS – patient-determined disease steps
PV – post-vaccination
Q25 – 25% quantile
Q75 – 75% quantile
RRMS – relapsing remitting MS
S1P RM – sphingosin-1-phosphate receptor modulator (fingolimod/ozanimod/siponimod)
SARS-CoV-2 – severe acute respiratory syndrome coronavirus 2
SPMS – secondary progressive MS
TER – teri-flunomide
U – Mann-Whitney U test
VACC – SARS-CoV-2 vaccination
* – denominators may differ due to missing values
